# Supplementary material for: μ-Opioid Receptor-Mediated AT1R–TLR4 Crosstalk Promotes Microglial Activation to Modulate Blood Pressure Control in the Central Nervous System
Source: MDPI journal article supplement (doi:10.3390/antiox10111784), 2021-11-08
Supplement: s1 [file s1]

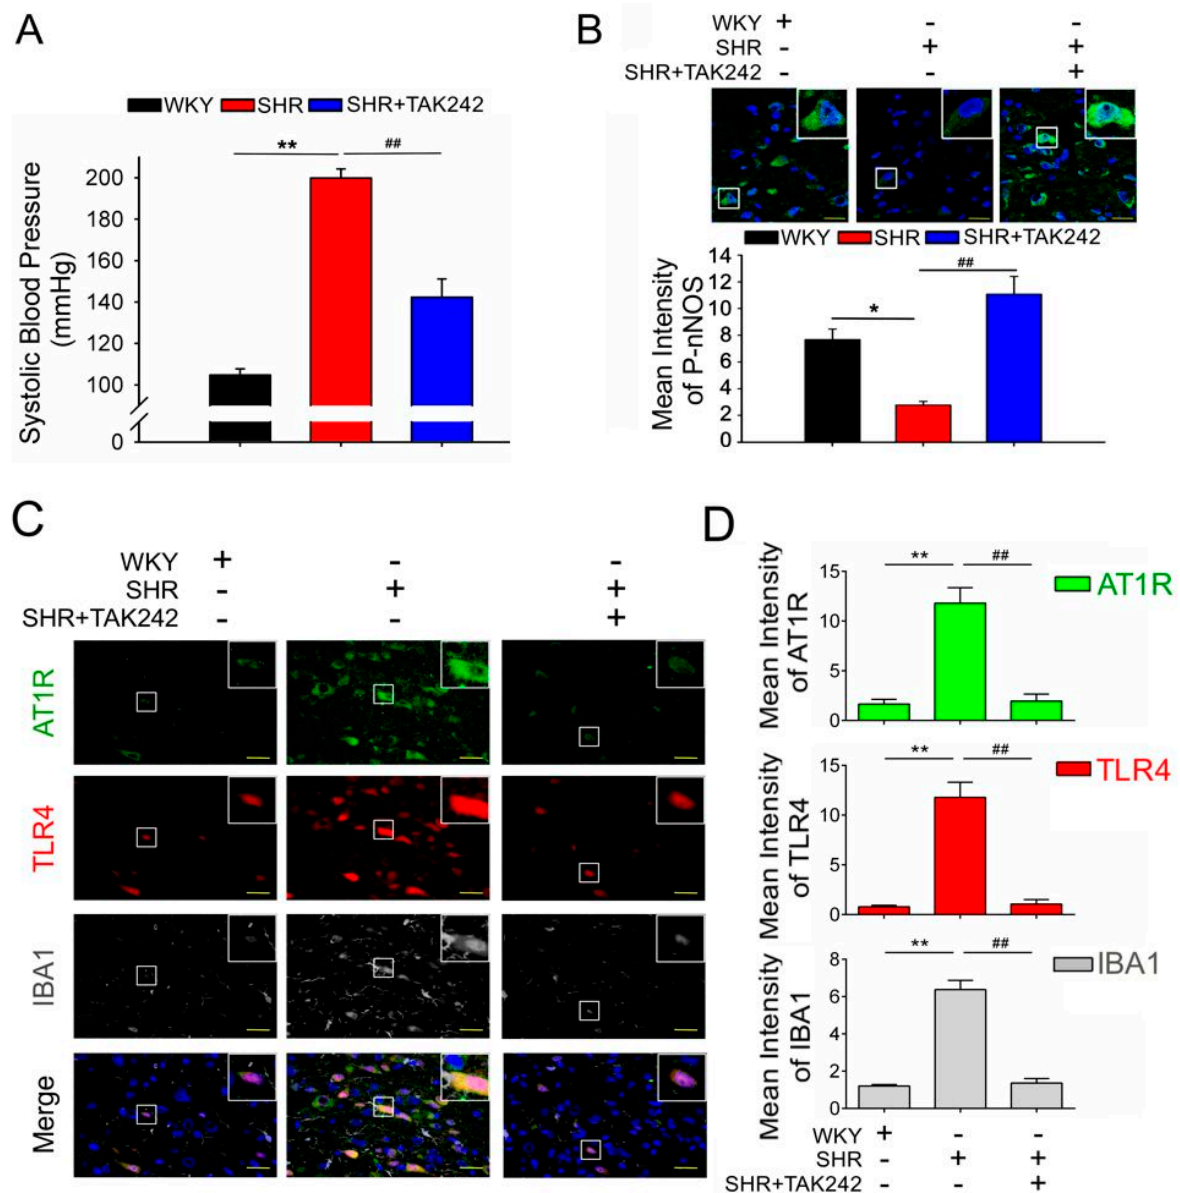

**Supplementary Figure S1.** Downregulation of TLR4-induced neurotoxicity is associated with nNOS<sup>S1416</sup> phosphorylation in the NTS of spontaneously hypertensive rats. (A) SBP after TAK242 administration for 2 weeks. (B) Representative fluorescence images for nNOS<sup>S1416</sup> (green)-positive cells in the NTS sections of WKY, SHRs, and SHRs treated with TAK242. One-way analysis of variance (ANOVA) with Scheffé post-hoc performed for statistical analysis. (C-D) Representative fluorescence images for AT1R (green), TLR4 (red) and microglial marker IBA-1 (white)-positive cells in the NTS sections of WKY, SHRs, and SHRs treated with TAK242. One-way analysis of variance (ANOVA) with Scheffé post-hoc was performed for statistical analysis. The values are presented as mean  $\pm$  SEM. \* $P < 0.05$ , significantly different from 20-week-old WKY. # $P < 0.05$  versus SHR. All data are presented as means  $\pm$  SEM (n = 6 per group).
